# Supplementary material
Source: PubMed Central journal article supplement (PMC9177735)
Supplement: NIHMS1800376-supplement-Short_In_Vivo_Checklist.pdf [file NIHMS1800376-supplement-Short_In_Vivo_Checklist.pdf]

**\* Short In Vivo Checklist**

AHA - Preclinical Animal Testing : Prevention of bias is important for experimental cardiovascular research. **This short checklist must be completed, and the answers should be clearly presented in the manuscript as well.** The checklist will be used by reviewers and editors but will not be published. If a revision is requested, you will be required to complete at revision submission a more detailed checklist that will be published with the accepted article.

This study involves animals:

Yes

**Animals**

Species, age, sex, strains, and sources of animals are described:

Yes

**Randomization**

Randomization and allocation concealment were performed:

Yes

**Blinding**

Blinding was performed:

Yes

**Inclusions and Exclusions (a)**

Specific criteria for inclusions and exclusions are specified:

Yes

**Inclusions and Exclusions (b)**

Criteria for inclusions and exclusions were set before the study:

Yes

**Reporting of Excluded Animals**

All animals excluded after the randomization are reported:

Yes

**Statistical Methods**

Statistical Methods are described:

Yes

---

Date completed: 04/13/2022 19:06:42

User pid: 419889
